# Supplementary material
Source: PubMed Central journal article supplement (PMC3911253)
Supplement: JB.01166-13_zjb999092998so1.pdf [file JB.01166-13_zjb999092998so1.pdf]

Table S1. *Bacillus subtilis* strains used in this study

| Strain             | Genotype                                                   |
|--------------------|------------------------------------------------------------|
| <i>B. subtilis</i> |                                                            |
| 168                | <i>trpC2</i>                                               |
| OC0010             | <i>trpC2 nsrRhis12-tet</i>                                 |
| ORB8277            | <i>trpC2 nsrRhis12-tet fur::kan</i>                        |
| ORB8278            | <i>trpC2 nsrRhis12-tet resD::cat</i>                       |
| ORB8238            | <i>trpC2 resDhis12</i>                                     |
| ORB8264            | <i>trpC2 resDhis12 nsrR::cat</i>                           |
| ORB8266            | <i>trpC2 resDhis12 fur::kan</i>                            |
| ORB8440            | <i>trpC2 furhis12</i>                                      |
| ORB8501            | <i>trpC2 furhis12 nsrR::cat</i>                            |
| ORB8502            | <i>trpC2 furhis12 resD::cat</i>                            |
| ORB8458            | <i>trpC2 ykuN::pMutin</i>                                  |
| ORB8461            | <i>trpC2 ykuN::pMutin fur::kan</i>                         |
| ORB8507            | <i>trpC2 ykuN::pMutin resD::spc</i>                        |
| ORB8508            | <i>trpC2 ykuN::pMutin nsrR::cat</i>                        |
| ORB8509            | <i>trpC2 ykuN::pMutin fur::kan nsrR::cat</i>               |
| ORB8510            | <i>trpC2 ykuN::pMutin fur::kan resD::spc</i>               |
| ORB8511            | <i>trpC2 ykuN::pMutin resD::spc nsrR::cat</i>              |
| ORB8512            | <i>trpC2 ykuN::pMutin fur::kan resD::spc nsrR::cat</i>     |
| ORB8620            | <i>trpC2 SPβc2del2::Tn917::pMMN392</i>                     |
| ORB8621            | <i>trpC2 SPβc2del2::Tn917::pMMN392 nsrR::cat</i>           |
| ORB8622            | <i>trpC2 SPβc2del2::Tn917::pMMN392 resD::spc</i>           |
| ORB8626            | <i>trpC2 SPβc2del2::Tn917::pMMN392 resD::spc nsrR::cat</i> |

Table S2. Oligonucleotides used in this study

| Oligonucleotide | Sequence                                                               | Position* | Purpose                            |
|-----------------|------------------------------------------------------------------------|-----------|------------------------------------|
| oSK203          | TAAGTCCAATCCAAATGGTTGAATA                                              | -189      | <i>sdpA</i> qPCR                   |
| oSK204          | TTTTGATGTAGATTACCTCCTAAGC                                              | -21       | <i>sdpA</i> qPCR                   |
| oSK211          | TCAGGAAAATCCATTTTAAAGACAG                                              | -166      | <i>ykuN</i> qPCR                   |
| oSK212          | TAGCCATGTATCACCCATTAGTT                                                | +7        | <i>ykuN</i> qPCR                   |
| oSK213          | GTA AAAATGCCCGTTTTTAAGGTATG                                            | -171      | <i>nasD</i> qPCR                   |
| oSK214          | GCACAGCAAAAAGGAATATTTAAGA                                              | -40       | <i>nasD</i> qPCR                   |
| oSK223          | TCATCTTTGGTAAAATTCATAAAAAGTTC                                          | -154      | <i>ctaB</i> qPCR                   |
| oSK224          | AACGTAAACCTCCCTTACAAACCTAAC                                            | -1        | <i>ctaB</i> qPCR                   |
| oSK237          | GTATGGTGCTCTATTGACGAAGAAAAAC                                           | -192      | <i>ydhC</i> qPCR                   |
| oSK238          | AAAATCATATAACAGATGGTAATGGGAAG                                          | -44       | <i>ydhC</i> qPCR                   |
| oSK240          | ATTCCGAGAATGAAGAGAAGATTAAGAAA                                          | -215      | <i>yukE</i> qPCR                   |
| oSK241          | AACAGTTTTTCGGCATAGTCAAACAAATA                                          | -76       | <i>yukE</i> qPCR                   |
| oSN86           | CATGTTTTTATCACCTAAAAGTTTACCAC                                          | -297      | <i>rpsD</i> qPCR                   |
| oSN87           | CGATACACCTTATTGATAAGGAACAAAATG                                         | -112      | <i>rpsD</i> qPCR                   |
| oBH6            | CCGTGTTTTATCTTCTATCCCTTG                                               | -171      | <i>feuA</i> qPCR                   |
| oBH7            | TTCATCTATAGAGCCTCCTGTTCA                                               | +5        | <i>feuA</i> qPCR                   |
| oBH24           | TGGTCTCCTCCTTAGTAAACCAT                                                | +21**     | <i>yopS/R</i> qPCR                 |
| oBH25           | TGAAATCCATTTGACTATTTTGG                                                | +4**      | <i>yopS/R</i> qPCR                 |
| oBH26           | TCCGTTTTTGCTAGGGGATT                                                   | -167      | <i>hmp</i> qPCR                    |
| oBH27           | TTTCGATTGTTTTGTTATCTAACATTT                                            | +25       | <i>hmp</i> qPCR                    |
| oMMN579         | TGACCTCACAGCCACTAATAGT                                                 | -70       | <i>ypqP</i> qPCR                   |
| oMMN580         | TCCTTTGTTTTGGACGTGGC                                                   | +85       | <i>ypqP</i> qPCR                   |
| nsrR-FF         | AAAACATGCACCCAGCTGGGTGCATG                                             |           | <i>nsrR-his</i> construct          |
| nsrR-FR         | <u>GGTGATGCGATCCTCTCATCTCGAGTTCCTTCATTTTAAAGCTTCATG</u>                |           | <i>nsrR-his</i> construct          |
| nsrR-BF         | <u>CGGAAGGATACTACATCCTGGTAGATTAAGATTCCTTCTTTTTTATG</u>                 |           | <i>nsrR-his</i> construct          |
| nsrR-BR         | TTCAGTTCTGACCCGTCATTTTAAACTC                                           |           | <i>nsrR-his</i> construct          |
| 12xhis-F        | CTCGAGATGAGAGGATCGCATCACCATC                                           |           | <i>nsrR-his</i> construct          |
| rPCR-tetR       | <u>CCAGGATGTAGTATCCTTCCGGGGTTATTGTCTCATGAGCG</u>                       |           | <i>nsrR-his</i> construct          |
| rPCR-CmF2       | GGATAGACTCCACCAGAAGAGCATCATCGGCAATAGTTACCC                             |           | <i>resD-his, fur-his</i> construct |
| rPCR-CmR2       | CCAGGATGTAGTATCCTTCCGCGGCTAGAGGATCTGGAGC                               |           | <i>resD-his, fur-his</i> construct |
| pAPNC-F         | CGACAGCGGAATTGACTCAAGC                                                 |           | <i>resD-his, fur-his</i> construct |
| Cm-R            | ATGTACCTGTAAAGATAGCGG                                                  |           | <i>resD-his, fur-his</i> construct |
| resDCd-1f       | ATTGAAGTGTGCCGGCAAATTCGTG                                              |           | <i>resD-his</i> construct          |
| resDCd-1r       | GCTCTTCTGGTGGAGTCTATCCTCAAATTTATAACCTACACCCCATAC                       |           | <i>resD-his</i> construct          |
| resDCd-2f       | CGGAAGGATACTACATCCTGGGAGGTCGGCGCTGAATGAAATTTTGG                        |           | <i>resD-his</i> construct          |
| resDCd-2r       | GCTTGAGTCAATTCGGCTGTCCGGCAAGCAAAGACTGGGATAAAAAG                        |           | <i>resD-his</i> construct          |
| resDCH-1r       | <u>GTGGTGGTGATGGTGATGGTGGTGCTCAGCACCGACTTCAAATTTATAACCTACACCCCATAC</u> |           | <i>resD-his</i> construct          |
| resDCH-2f       | <u>GCACCACCATCACCATCACCACCACCATCATCACCATGAGGTCGGCGCTGAATGAAATTTTGG</u> |           | <i>resD-his</i> construct          |
| resD-s3         | GAAGCCATTGCCAAAGGGCTTGAAG                                              |           | <i>resD-his</i> construct          |
| resD-s4         | ATGTGGTCAGCACAATCGCAATTCC                                              |           | <i>resD-his</i> construct          |

|          |                                                                |                          |
|----------|----------------------------------------------------------------|--------------------------|
| furCd-1f | GCTTACATCTAGACTTTTTTAAAATCAT                                   | <i>fur-his</i> construct |
| furCd-1r | GCTCTTCTGGTGGAGTCTATCCTTCAGTTTCTTTTCCGTTACAGC                  | <i>fur-his</i> construct |
| furCd-2f | CGGAAGGATACTACATCCTGGTAGACGGTGCCGAGCGCGAACCTT                  | <i>fur-his</i> construct |
| furCd-2r | GCTTGAGTCAATTCCGCTGTCGGGATAATATGTATGCGGGTAAC                   | <i>fur-his</i> construct |
| furCH-1r | <u>GATGATGGTGGTGGT</u> GATGGTGGTGGTTCAGTTTCTTTTCCGTTACAGC      | <i>fur-his</i> construct |
| furCH-2f | <u>CATCACCATCACCACCACCATC</u> ATCACCATTAGACGGTGCCGAGCGCGAACCTT | <i>fur-his</i> construct |
| fur-s3   | GGTCATTCTGTTTTTAGCGCTGATTT                                     | <i>fur-his</i> construct |
| fur-s4   | ATGCCAAATGCCGCGCCGATGTCTT                                      | <i>fur-his</i> construct |

---

Underlines indicate his-coding regions.

\*Listed is the position of 5'-end nucleotide relative to the translation start site.

\*\*As for oBH24 and oBH25, the position of 5'-end nucleotide is shown relative to the last nucleotide of the stop codon of conversely transcribed *yopS* and *yopR*, respectively.

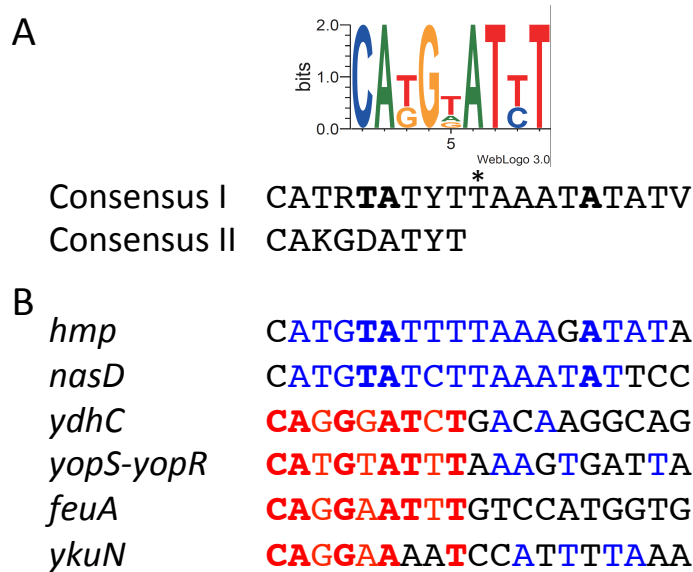

**Fig. S1.** Motifs found in promoter regions targeted by NsrR. A. The consensus sequence for NsrR-binding was previously proposed by base substitution analysis of the *nasD* promoter (15). The asterisk shows the center of the dyad symmetry and the nucleotides in bold play critical roles in repressor activity. The half site of the previously proposed consensus sequence for NsrR is found from the sequence logo (<http://meme.nbcr.net>) of high- and middle-level NsrR-binding sites identified by ChAP-chip experiment in this study. B. Nucleotides marked in blue correspond to conserved residues in the NsrR-binding sequence and those marked in red correspond to conserved residues in the half site. Highly conserved nucleotides are shown in bold.
